# Supplementary material
Source: MDPI journal article supplement (https://www.mdpi.com/1660-4601/12/1/439)
Supplement: s1 [file s1]

## Association between Temperature Change and Outpatient Visits for Respiratory Tract Infections among Children in Guangzhou, China

---

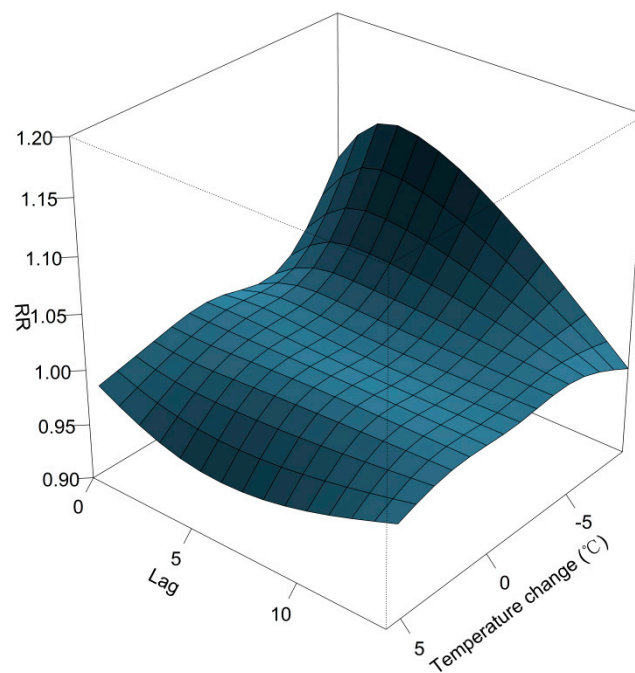

**Figure S1.** 3-D plot of RRs along temperature change (°C) and lags, with reference at 0 °C and a 14-day maximum lag time.

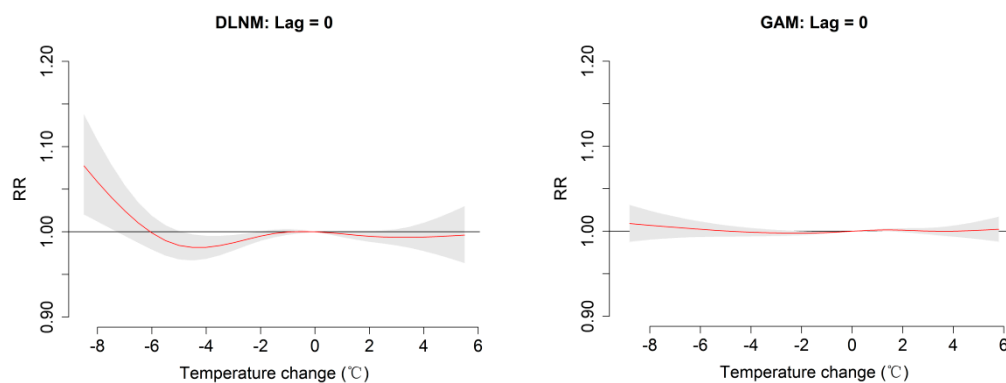

**Figure S2.** *Cont.*

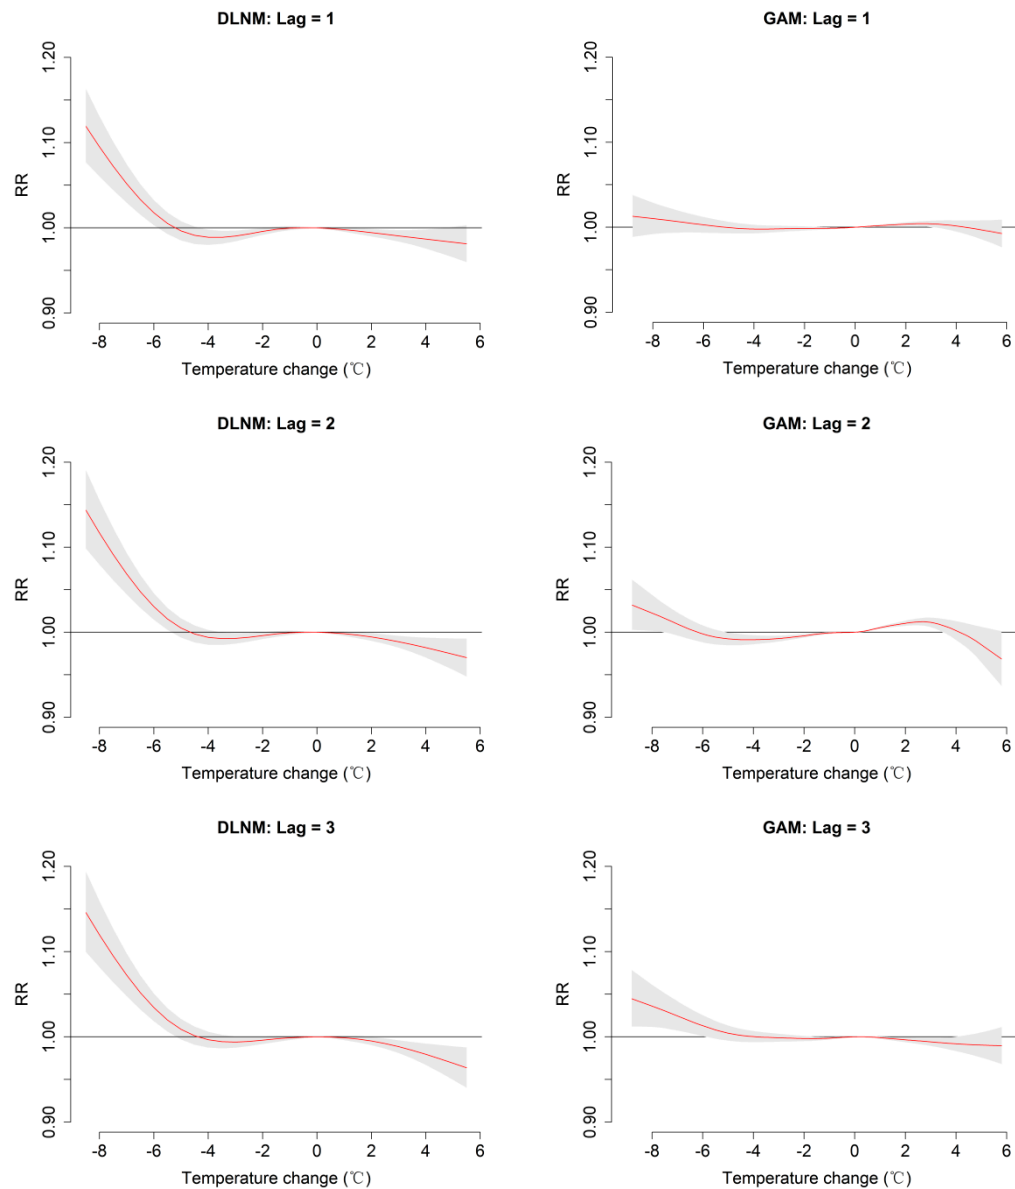

**Figure S2.** Comparison of lag-specific RRs generated by DLNM models and GAM models.

© 2015 by the authors; licensee MDPI, Basel, Switzerland. This article is an open access article distributed under the terms and conditions of the Creative Commons Attribution license (<http://creativecommons.org/licenses/by/4.0/>).
